# Supplementary material for: Development of dopant-free conductive bioelastomers
Source: Sci Rep. 2016 Sep 30;6:34451. doi: 10.1038/srep34451 (PMC5043381; doi:10.1038/srep34451)
Supplement: Supplementary Information [file srep34451-s1.pdf]

## **Supplementary Information**

### **Development of dopant-free conductive bioelastomers**

Cancan Xu<sup>1,2</sup>, YiHui Huang<sup>1,2</sup>, Gerardo Yopez<sup>3</sup>, Zi Wei<sup>4</sup>, Fuqiang Liu<sup>4</sup>, Alejandro Bugarin<sup>3</sup>,  
Liping Tang<sup>1,2</sup> & Yi Hong<sup>1,2\*</sup>

<sup>1</sup>Department of Bioengineering, University of Texas at Arlington, Arlington, TX 76019, USA

<sup>2</sup>Joint Biomedical Engineering Program, University of Texas Southwestern Medical Center,  
Dallas, TX 75093, USA

<sup>3</sup>Department of Chemistry and Biochemistry, University of Texas at Arlington, Arlington, Texas  
76019, USA

<sup>4</sup>Department of Material Science and Engineering, University of Texas at Arlington, Arlington,  
TX 76019, USA

\* **Corresponding author:** Yi Hong, [yihong@uta.edu](mailto:yihong@uta.edu), Tel: +1-817-272-0562; Fax: +1-817-272-2251.

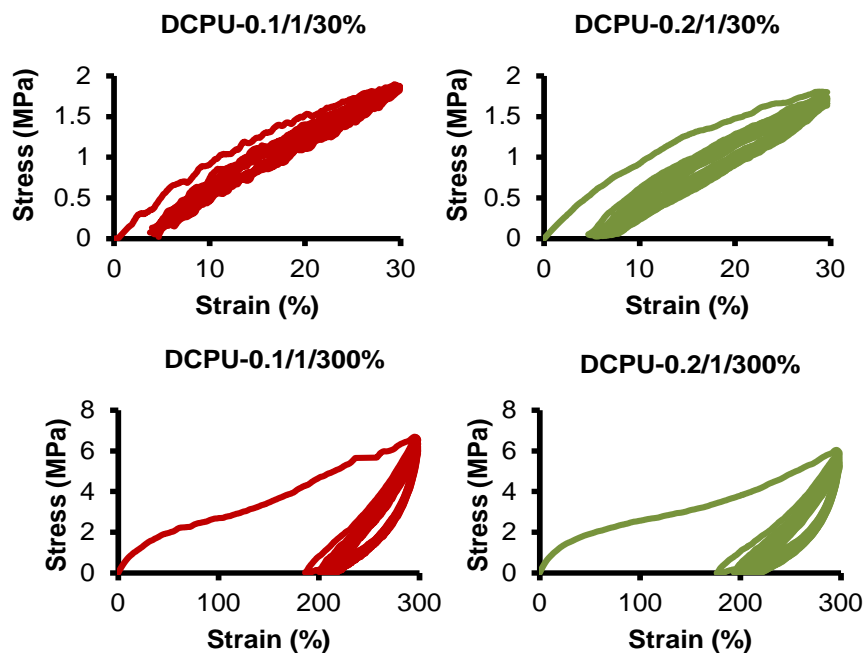

**Supplementary Figure S1.** Cyclic stretching of DCPU-0.1/1 and DCPU-0.2/1 at 30% and 300% deformations.

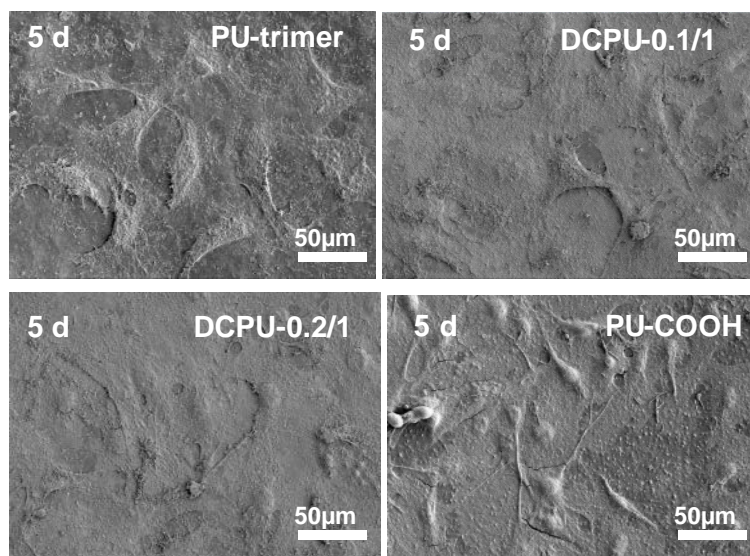

**Supplementary Figure S2.** Scanning electron micrographs of mouse 3T3 fibroblasts cultured on PU-trimer, DCPU-0.1/1, DCPU-0.2/1 and PU-COOH films at day 5.

### **Supplementary Video Legend**

**Supplementary Video S1.** DCPU film knotting and stretching, and scaffold compression, which exhibit the softness, stretchability, elasticity and processability of the DCPU.
